# Supplementary material for: NiFe-LDH/g-C3N4 binary heterostructures with 2D/2D configuration for highly efficient photocatalytic degradation of antibiotics and hydrogen production
Source: Royal Society of Chemistry journal article supplement (doi:10.1039/d3ce01133j), 2023-12-18
Supplement: d3ce01133j1.pdf [file d3ce01133j1.pdf]

## Electronic Supplementary Information

(*CrystEngComm*)

### **NiFe-LDH/g-C<sub>3</sub>N<sub>4</sub> binary heterostructures with 2D/2D configuration for highly efficient photocatalytic degradation of antibiotics and hydrogen production**

*Yujie Jia*<sup>a,†</sup>, *Shuhan Jiang*<sup>a,†</sup>, *Qianchen Ou*<sup>a</sup>, *Yanan Liu*<sup>a</sup>, *Jian Zhang*<sup>c</sup>,  
*Yangjie Zhou*<sup>a</sup>, *Yuan Lian*<sup>b,\*</sup>, *Hongmei Wang*<sup>a,\*</sup>

<sup>a</sup>*Jiaying Key Laboratory of Molecular Recognition and Sensing, College of  
Biological, Chemical Sciences and Engineering, Jiaying University, Jiaying 314001,  
China*

<sup>b</sup>*College of Material and Textile Engineering, Jiaying University, Jiaying 314001,  
China*

<sup>c</sup>*Analysis and testing center, Jiaying University, Jiaying 314001, China*

#### **Photoelectrochemical measurements**

The PEC performance was tested using a three-electrode working system, that is, the electrode containing the sample as the working electrode, the standard Ag/AgCl electrode as the reference electrode, the platinum electrode as the counter electrode, and the electrolyte solution was 0.100 M Na<sub>2</sub>SO<sub>4</sub> solution as the electrolyte. The working electrode was prepared by the following procedure. 5.00 mg samples were dispersed with 800 μL isopropanol, 200 μL deionized water and 50 μL Nafion solution by ultrasound, then the mixture was coated on conductive glass (FTO) with an area of about 2 cm<sup>2</sup>.

**Table S1** Comparison of the H<sub>2</sub> revolution rates with other photocatalysts.

| Catalysts                                                                       | Light source                         | Sacrificial reagent | H <sub>2</sub> yield<br>( $\mu\text{mol}\cdot\text{g}^{-1}$ ) | Reaction time<br>(h) | Refs.     |
|---------------------------------------------------------------------------------|--------------------------------------|---------------------|---------------------------------------------------------------|----------------------|-----------|
| NiFe-LDH/<br>g-C <sub>3</sub> N <sub>4</sub>                                    | $\lambda > 400$ nm<br>300 W Xe       | 15 vol.% TEOA       | 3122                                                          | 4                    | This work |
| NiCo-LDH/<br>g-C <sub>3</sub> N <sub>4</sub>                                    | $\lambda > 400$ nm<br>300 W Xe       | 15 vol.% TEOA       | 1355.1                                                        | 3                    | [S1]      |
| CoAl-LDH/<br>g-C <sub>3</sub> N <sub>4</sub>                                    | Optical filter<br>AM 1.5<br>300 W Xe | 10 vol.% TEOA       | 2720.5                                                        | 4                    | [S2]      |
| In <sub>2</sub> S <sub>3</sub> /g-C <sub>3</sub> N <sub>4</sub> /<br>CoZnAl-LDH | $\lambda > 410$ nm<br>300 W Xe       | methanol            | 404.78                                                        | 8                    | [S3]      |
| Pt/CoO/g-<br>C <sub>3</sub> N <sub>4</sub>                                      | $\lambda > 400$ nm<br>300 W Xe       | 10 vol.% TEOA       | 2605.2                                                        | 4                    | [S4]      |
| Pt/Al <sub>2</sub> O <sub>3</sub> /<br>g-C <sub>3</sub> N <sub>4</sub>          | $\lambda > 420$ nm<br>300 W Xe       | 25 vol.% TEOA       | 3126                                                          | 6                    | [S5]      |
| ACN-550                                                                         | $\lambda > 190$ nm<br>300 W Xe       | 10 vol.% TEOA       | 4570.8 $\pm$ 25.8                                             | 6                    | [S6]      |

**Table S2** Comparison of the degradation efficiency with other photocatalysts.

| Catalysts                                                                     | Light source                   | Degradation<br>efficiency | Pollutants | Reaction time<br>(min) | Refs.     |
|-------------------------------------------------------------------------------|--------------------------------|---------------------------|------------|------------------------|-----------|
| 1.8LDH/CN                                                                     | $\lambda > 400$ nm<br>300 W Xe | 76.3%                     | TC         | 80                     | This work |
| NTU-9/C <sub>3</sub> N <sub>4</sub>                                           | LED                            | 65%                       | toluene    | 60                     | [S7]      |
| BiOI/ZnFe <sub>2</sub> O <sub>4</sub> /<br>g-C <sub>3</sub> N <sub>4</sub>    | LED                            | 66.6%                     | phenol     | 120                    | [S8]      |
| g-C <sub>3</sub> N <sub>4</sub> /LDH-<br>OVs                                  | $\lambda > 420$ nm<br>300 W Xe | 95%                       | TC         | 90                     | [S9]      |
| Fe <sub>2</sub> O <sub>3</sub> /g-C <sub>3</sub> N <sub>4</sub> /<br>300 W Xe | $\lambda > 420$ nm<br>300 W Xe | 70%                       | MB         | 90                     | [S10]     |

## Notes and references

[S1] Nong J, Jin Y, Tan J, *et al.* Construction of NiCo-LDH/g-C<sub>3</sub>N<sub>4</sub> heterojunctions as efficient

photocatalysts for enhanced degradation of tetracycline hydrochloride and hydrogen evolution. *New J. Chem.*, 2022, 46, 22830-22840.

[S2] Zhang J, Zhu Q, Wang L, *et al.* g-C<sub>3</sub>N<sub>4</sub>/CoAl-LDH 2D/2D Hybrid Heterojunction for Boosting Photocatalytic Hydrogen Evolution. *Int. J. Hydrogen Energ.*, 2020, 45(41), 21331-21340.

[S3] Sun X, Li L, Hu T, *et al.* In<sub>2</sub>S<sub>3</sub>/g-C<sub>3</sub>N<sub>4</sub>/CoZnAl-LDH composites with the lamellar dual S-scheme heterostructure and its enhanced photocatalytic performance. *Colloid Surface A*, 2023, 658, 130744.

[S4] Mao Z, Chen J, Yang Y, *et al.* Fahlman BD. Novel g-C<sub>3</sub>N<sub>4</sub>/CoO nanocomposites with significantly enhanced visible-light photocatalytic activity for H<sub>2</sub> evolution. *ACS Appl. Mater. Interfaces*, 2017, 9(14), 12427e35.

[S5] Li F, Liu S, Xue Y, *et al.* Structure modification function of g-C<sub>3</sub>N<sub>4</sub> for Al<sub>2</sub>O<sub>3</sub> in the in situ hydrothermal process for enhanced photocatalytic activity. *Chem. Eur. J.*, 2015, 21(28), 10149e59.

[S6] Meng F, Tian W, Tia Z, *et al.* Enhanced photocatalytic organic pollutant degradation and H<sub>2</sub> evolution reaction over carbon nitride nanosheets: N defects abundant materials. *Sci. Total Environ.*, 2022, 851, 158360.

[S7] Makowski D, Lisowski W, Baluk M A, *et al.* Design and Synthesis of NTU-9/C<sub>3</sub>N<sub>4</sub> Photocatalysts: Effects of NTU-9 Content and Composite Preparation Method. *Materials*, 2023, 16 (14), 5007.

[S8] Khasevani S G, Gholami M R. Synthesis of BiOI/ZnFe<sub>2</sub>O<sub>4</sub>-metal-organic framework and g-C<sub>3</sub>N<sub>4</sub>-based nanocomposites for applications in photocatalysis. *Ind. Eng. Chem. Res.*, 2019, 58 (23), 9806-9818.

[S9] Zheng J, Fan C, Li X, *et al.* Effective mineralization and detoxification of tetracycline hydrochloride enabled by oxygen vacancies in g-C<sub>3</sub>N<sub>4</sub>/LDH composites. *Sep. Purif. Technol.*, 2023, 305, 122554.

[S10] Karimi M A, Iliyati M, Atashkadi M, *et al.* Microwave-assisted synthesis of the Fe<sub>2</sub>O<sub>3</sub>/g-C<sub>3</sub>N<sub>4</sub> nanocomposites with enhanced photocatalytic activity for degradation of methylene blue. *J. Chin. chem. soc.*, 2020, 67(11), 2032-2041.
